# Supplementary material for: Robust vibrational coherence protected by a core–shell structure in silver nanoclusters
Source: Royal Society of Chemistry journal article supplement (doi:10.1039/d4sc00009a), 2024-01-01
Supplement: d4sc00009a1.pdf [file d4sc00009a1.pdf]

## Supplementary information

### **Robust Vibrational Coherence Protected by Core-Shell Structure in Silver Nanoclusters**

*Jie Kong,<sup>1#</sup> Zhuoran Kuang,<sup>2#</sup> Wei Zhang,<sup>1#</sup> Yongbo Song,<sup>3\*</sup> Guo Yao,<sup>4</sup> Chunfeng Zhang,<sup>4</sup>  
He Wang,<sup>5</sup> Yi Luo,<sup>1\*</sup> Meng Zhou<sup>1\*</sup>*

---

<sup>1</sup>Hefei National Research Center for Physical Sciences at the Microscale, University of Science and Technology of China, Hefei, Anhui 230026, P. R. China

<sup>2</sup>State Key Laboratory of Information Photonic and Optical Communications, School of Science Beijing University of Posts and Telecommunications (BUPT), Beijing 100876, P. R. China

<sup>3</sup>School of Biomedical Engineering, Research and Engineering Center of Biomedical Materials, Anhui Medical University, Hefei, Anhui 230032, P. R. China

<sup>4</sup>National Laboratory of Solid State Microstructures, School of Physics, and Collaborative Innovation Center for <sup>5</sup>Advanced Microstructures, Nanjing University, Nanjing 210093, P. R. China

<sup>5</sup>Department of Physics, University of Miami, Coral Gables, Florida 33146, United States

#These authors contributed equally

\*Corresponding author. Email: [ybsong860@ahmu.edu.cn](mailto:ybsong860@ahmu.edu.cn); [yiluo@ustc.edu.cn](mailto:yiluo@ustc.edu.cn);  
[mzhou88@ustc.edu.cn](mailto:mzhou88@ustc.edu.cn)

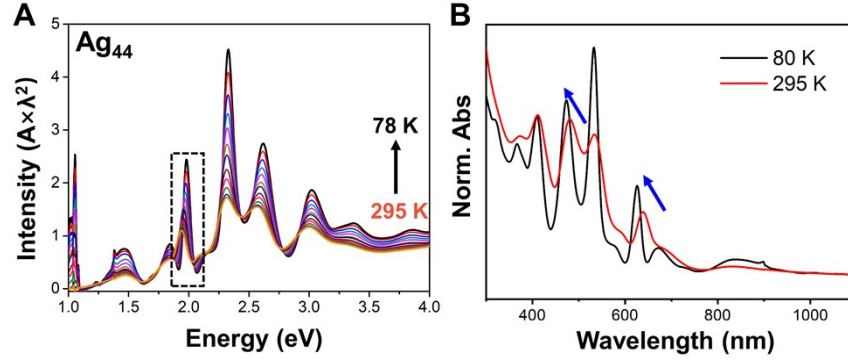

**Figure S1.** (A) Temperature dependent electronic absorption spectra of Ag<sub>44</sub> NCs in energy scale. The spike around 900 nm (1.37 eV) is an instrument artifact and the peak around 1.0 eV is the residual absorption of the solvent. (B) The selected temperature dependent normalized (at 400 nm) absorption spectra to show the blue shift.

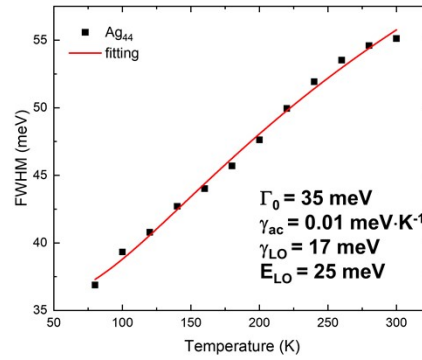

**Figure S2.** The relationship between the FWHM and temperature for Ag<sub>44</sub> NCs. The red line is the fitting results according to equation S1.

The temperature dependent FWHM reflects the vibronic coupling according to equation S1,

$$I(T) = I(0) + \gamma_{ac}T + \frac{\gamma_{LO}}{e^{E_{LO}/k_B T} - 1} \quad (S1)$$

where the  $\Gamma$  is the FWHM in eV unit,  $\Gamma_0$  is the FWHM at 0 K,  $\gamma_{ac}$  and  $\gamma_{LO}$  are the coupling strength to the acoustic phonon and longitudinal optical phonon,  $E_{LO}$  is the optical phonon energy.

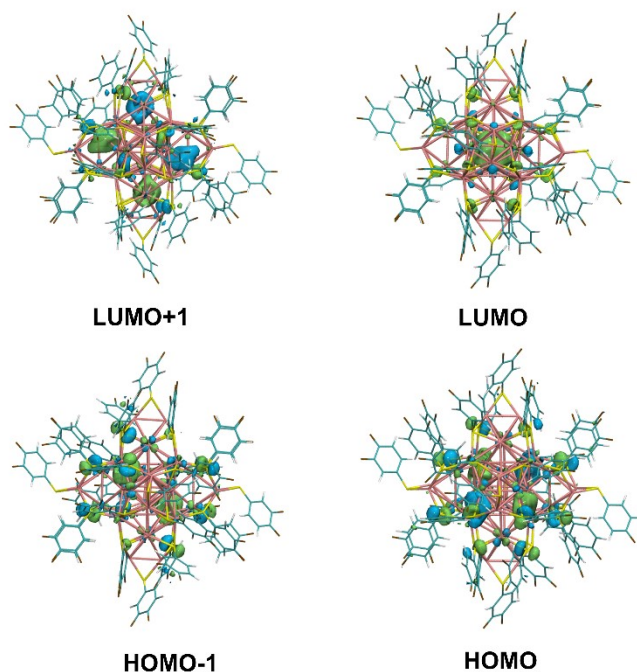

**Figure S3.** The isosurface of the HOMO-1, HOMO, LUMO, LUMO+1 of Ag<sub>44</sub> via VMD software. <sup>1</sup>

**Table S1.** Computed electronic excitation properties for Ag<sub>44</sub> at the optimized S<sub>0</sub> geometry at the PBE/PBE level.

| S <sub>0</sub> geometry   | S <sub>0</sub> →S <sub>1</sub> | S <sub>0</sub> →S <sub>2</sub> | S <sub>0</sub> →S <sub>3</sub> |
|---------------------------|--------------------------------|--------------------------------|--------------------------------|
| E(eV)                     | 0.899                          | 0.932                          | 0.986                          |
| Oscillator strength       | 0                              | 0                              | 0.0054                         |
| Main orbital contribution | HOMO→LUMO<br>98%               | HOMO-1→LUMO<br>98%             | HOMO→LUMO+1<br>94%             |

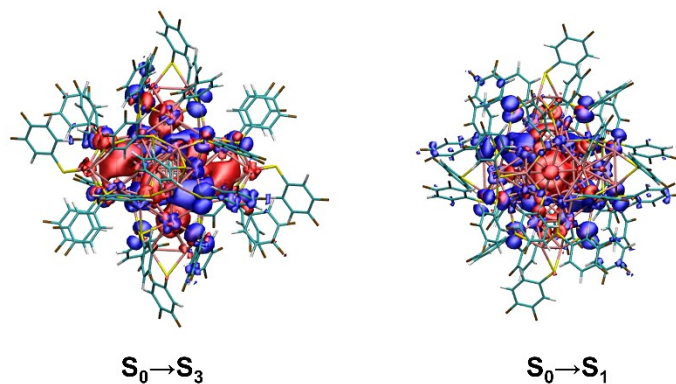

**Figure S4.** CDDs between S<sub>1/3</sub> and S<sub>0</sub> states of Ag<sub>44</sub> at optimized S<sub>0</sub> geometries (The red

and blue represent the electron and hole distributions, respectively).

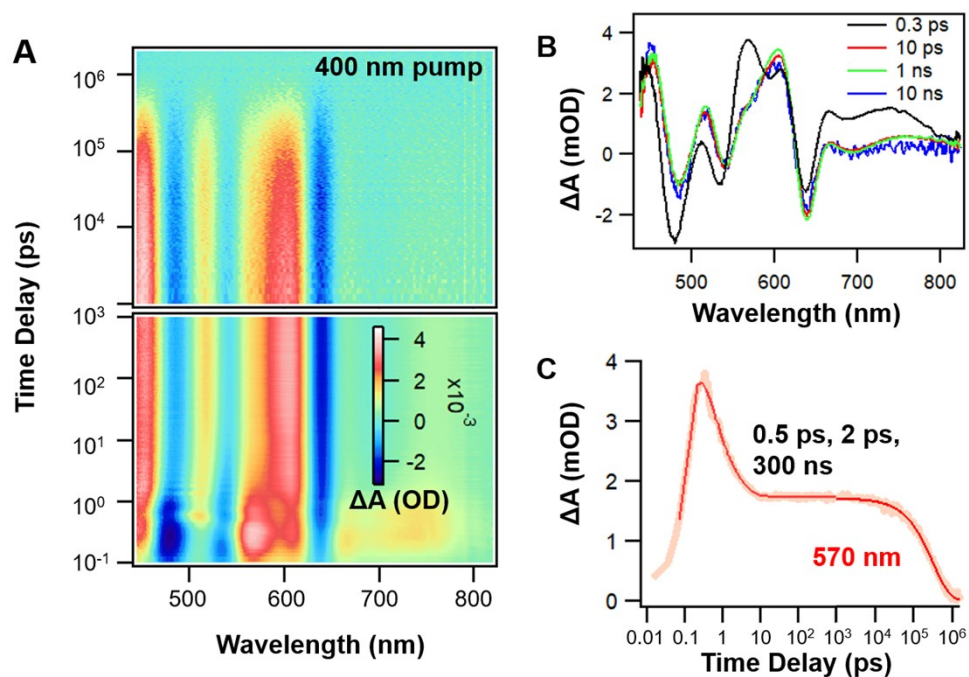

**Figure S5.** (A) Transient absorption (TA) data map of Ag<sub>44</sub> with excitation at 400 nm; (B) TA spectra of Ag<sub>44</sub> at selected time delays; (C) TA kinetic trace probed at 570 nm and the corresponding fit.

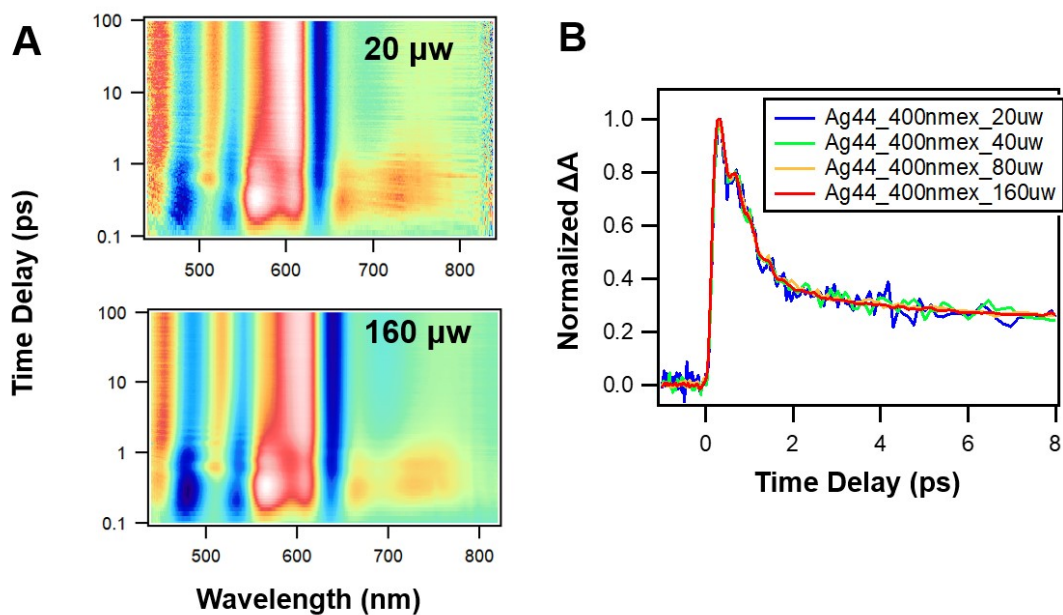

**Figure S6.** (A) Transient absorption data map of  $\text{Ag}_{44}$  dissolved in acetone with under different pump power (20 and 160  $\mu\text{W}$ ); (B) TA kinetics probed at 670 nm with different pump powers.

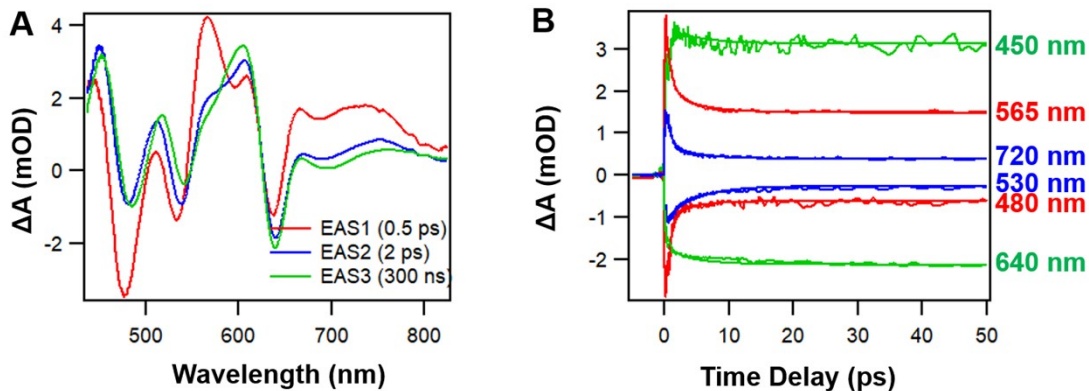

**Figure S7.** (A) Evolution associated spectra (EAS) obtained from global fitting on the TA data of  $\text{Ag}_{44}$  pumped at 400 nm; (B) TA kinetics probe at selected wavelengths and the global fitting results.

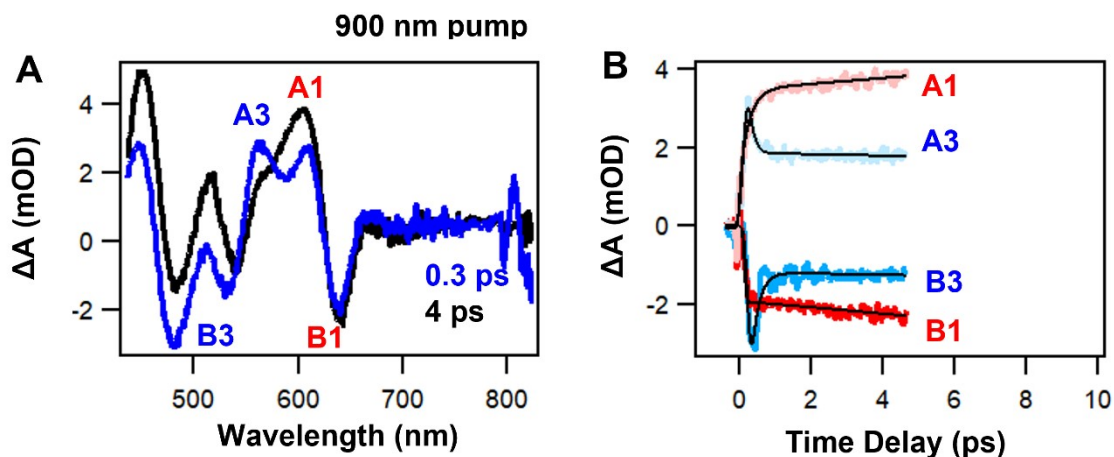

**Figure S8** (A) TA spectra probe at 0.3 ps and 4 ps after pumped at 900 nm; (B) TA kinetics probe at selected wavelengths and corresponding fits.

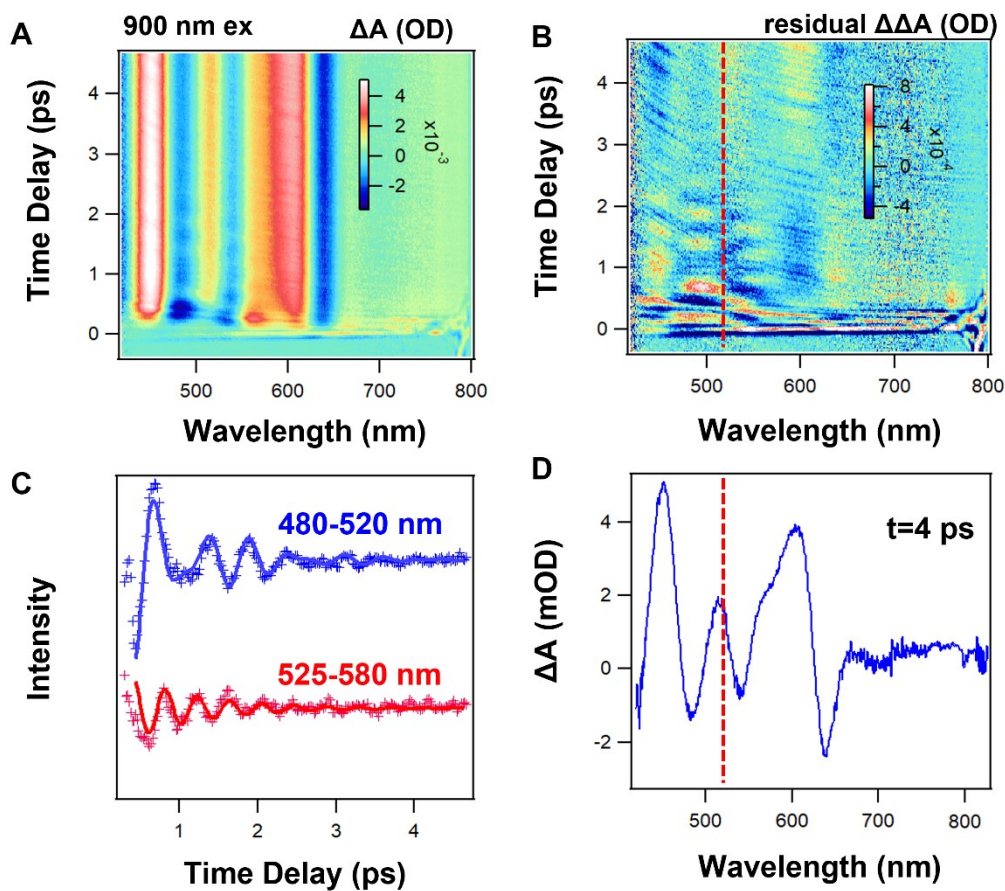

**Figure S9.** (A) Transient absorption data map of  $\text{Ag}_{44}$  with 900 nm excitation; (B) TA data map after subtracting population kinetics obtained from global fitting. (C) TA residuals as a function of time delay of  $\text{Ag}_{44}$  NCs probe at selected wavelength regions and corresponding fits. (D) TA spectrum of  $\text{Ag}_{44}$  probed at 4 ps, the red dashed line indicates



the probe wavelength where the phase shift occurs.

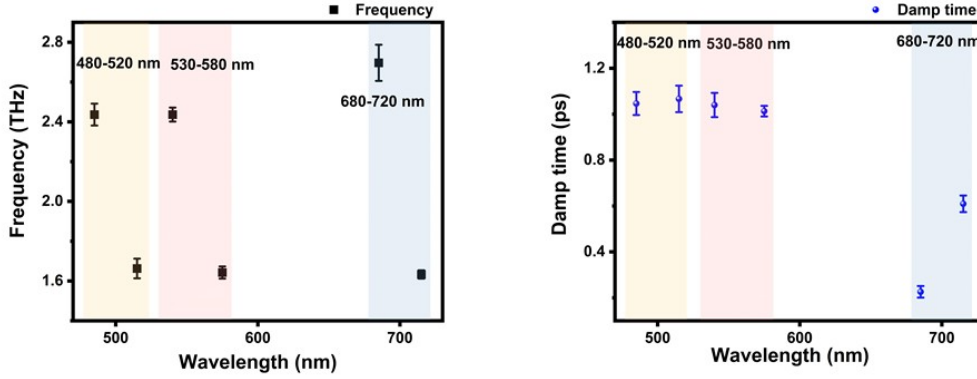

**Figure S10.** The coherent oscillation results obtained from the fitting results of residual data of  $\text{Ag}_{44}$  with 400 nm excitation. Note that the error bars were calculated based on three times TA experiments.

**Table S2.** The coherent oscillation results for  $\text{Ag}_{44}$  obtained from the fitting results of residual data with 900 nm excitation.

| Probe range (nm) | Period (ps) | Frequency (THz) | $t_{\text{damp}}$ (ps) |
|------------------|-------------|-----------------|------------------------|
| 480-520          | 0.42        | 2.38            | 1.0                    |
|                  | 0.61        | 1.67            | 1.0                    |
| 525-580          | 0.41        | 2.43            | 1.1                    |

To extract the damping time ( $\tau$ ) of the coherent process, we use a fitting procedure that accounts for the convolution of the Gaussian impulsive function (with standard deviation  $\sigma$ ) with the residual decay amplitude and a single or two frequency damped oscillator: <sup>2</sup>

$$f(t) = f_{osc}(t) \int_{-\infty}^{\infty} f_{IRF}(\tau) f_{damp}(t - \tau) d\tau \quad (\text{eq S2})$$

where

$$f_{osc}(t) = \cos\left(\frac{2\pi}{t_{osc}}t + \varphi\right) \quad (\text{eq S3})$$

$$f_{damp}(t) = Ae^{-\frac{t}{t_d}} \quad (\text{eq S4})$$

$$f_{IRF}(t) = \frac{1}{\sqrt{2\pi}w} e^{-\frac{(t-t_c)^2}{2w^2}} \quad (\text{eq S5})$$

$f_{osc}(t)$  represents the cosine oscillating term,  $f_{damp}(t)$  represents the damping term, and  $f_{IRF}(t)$  represents the instrumental response function (IRF). The form of convolution can be rewritten as :

$$f(t) = \sum A_i e^{\frac{1}{2}\left(\frac{w}{t_{di}}\right)^2 - \frac{t-t_c}{t_{di}}} \cos\left(\frac{2\pi}{t_{osci}}t + \varphi_i\right) \int_{-\infty}^z \frac{1}{\sqrt{2\pi}} e^{-\frac{y^2}{2}} dy \quad (\text{eq S6})$$

in which  $A_i$  denotes the amplitude of the  $i$ th oscillation component,  $t_{osci}$  denotes the time constant of the  $i$ th oscillation component,  $t_{di}$  denotes the time constant of the  $i$ th damping,  $t_c$  denotes the time zero of the IRF,  $w = FWHM/2\sqrt{\ln 4}$  and FWHM denotes the full-width-half-maximum of the IRF,  $\varphi_i$  is the relative phase of the  $i$ th oscillation component, and

$$z = \frac{t-t_c}{w} - \frac{w}{t_d}$$

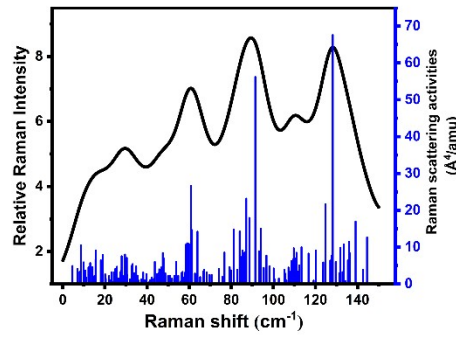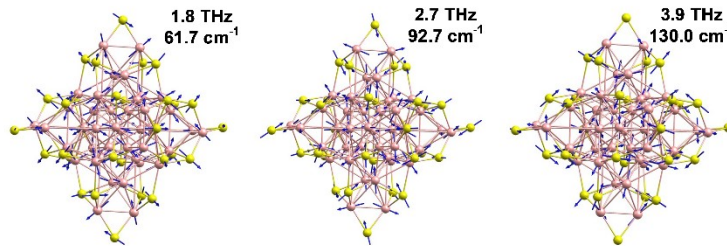



**Figure S11.** Computed simulation Raman spectra of the  $\text{Ag}_{44}$  nanocluster (frequency correction factor: 0.986).<sup>3-4</sup>The displacement of selected atoms (arrows), and the vibration modes deduced by DFT computations on  $\text{Ag}_{44}$ .

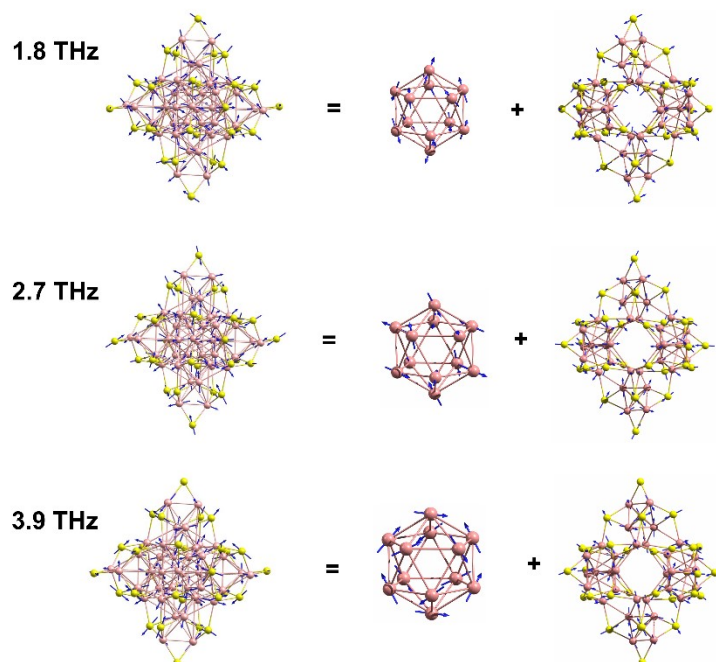

**Figure S12.** Decomposition of the normal mode of  $\text{Ag}_{44}$  into contributions from the  $\text{Ag}_{12}$  core and the  $\text{Ag}_{32}\text{S}_{30}$  ligand binding motifs.

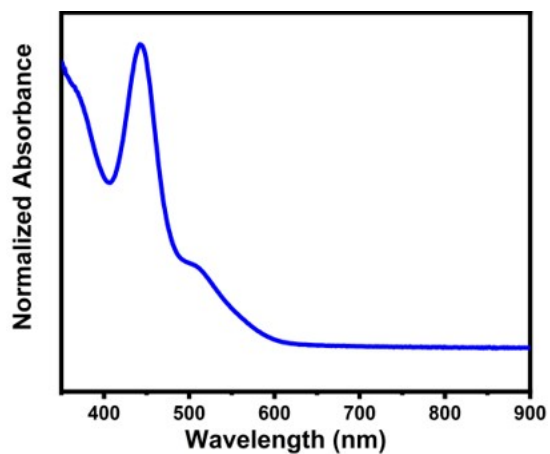

**Figure S13.** UV-vis absorption spectrum of  $\text{Ag}_{29}$  NCs.

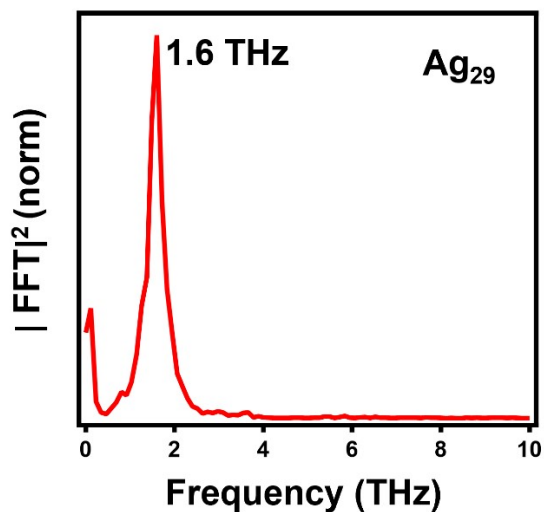

**Figure S14.** FFT intensity of TA residual of  $\text{Ag}_{29}$  probed at 550 nm.

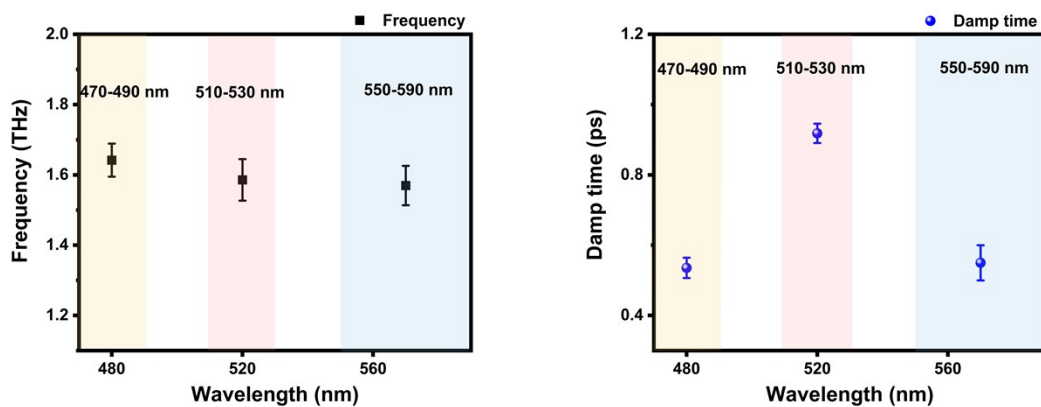

**Figure S15.** The oscillation frequencies and damp time of  $\text{Ag}_{29}$  as a function of probe wavelength at 400 nm excitation. Note that the error bars were calculated based on three times TA experiments.

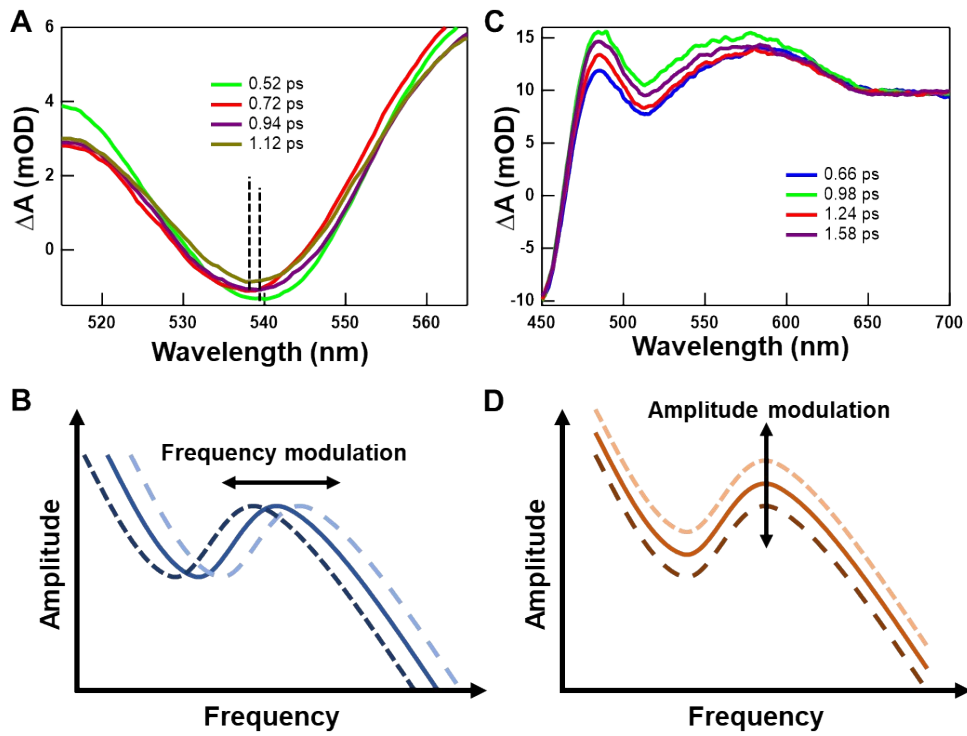

**Figure S16.** (A) The GSB position of  $\text{Ag}_{44}$  at different time delay. (B) The schematic diagram of frequency modulated oscillations. (C) The TA spectra of  $\text{Ag}_{29}$  at different time delay. (D) The schematic diagram of amplitude modulated oscillations.

## References.

1. Humphrey, W.; Dalke, A.; Schulten, K. Vmd: Visual Molecular Dynamics. *J. Mol. Graph.* **1996**, *14*, 33-38.
2. Zhang, W.; Kong, J.; Li, Y.; Kuang, Z.; Wang, H.; Zhou, M. Coherent Vibrational Dynamics of Au<sub>144</sub>(SR)<sub>60</sub> Nanoclusters. *Chem. Sci.* **2022**, *13*, 8124-8130.
3. Merrick, J. P.; Moran, D.; Radom, L. An Evaluation of Harmonic Vibrational Frequency Scale Factors. *J. Phys. Chem. A* **2007**, *111*, 11683-11700.
4. Russell, J., Nist 101. Computational Chemistry Comparison and Benchmark Database. CCCBDB Computational Chemistry Comparison and Benchmark Database: 1999.
